# Supplementary material
Source: publisher figshare collection journal article supplement (https://karger.figshare.com/ndownloader/files/13078133)

## SUPPLEMENTARY MATERIAL

# **Analysis of lncRNA-Associated Cerna Network Reveals Potential lncRNA Biomarkers in Human Colon Adenocarcinoma**

Zhiyuan Zhang<sup>a,b</sup> Wenwei Qian<sup>a,b</sup> Sen Wang<sup>a,b</sup> Dongjian Ji<sup>a,b</sup>  
Qingyuan Wang<sup>a,b</sup> Jie Li<sup>a,b</sup> Wen Peng<sup>a,b</sup> Jiou Gu<sup>a,b</sup> Tao Hu<sup>a,b</sup>  
Bing Ji<sup>a,b</sup> Yue Zhang<sup>a,b</sup> Shijia Wang<sup>a,b</sup> Yueming Sun<sup>b</sup>

<sup>a</sup>The First School of Clinical Medicine, Nanjing Medical University, Nanjing, <sup>b</sup>Department of General Surgery, The First Affiliated Hospital of Nanjing Medical University, Nanjing, China

**Supplementary Fig. S1.** The lncRNA-miRNA-mRNA ceRNA network. Red balls represent upregulated mRNAs, blue balls represent downregulated mRNAs; red squares represent upregulated miRNAs, blue squares represent downregulated miRNAs; red diamonds represent upregulated lncRNAs, blue diamonds represent downregulated lncRNAs.

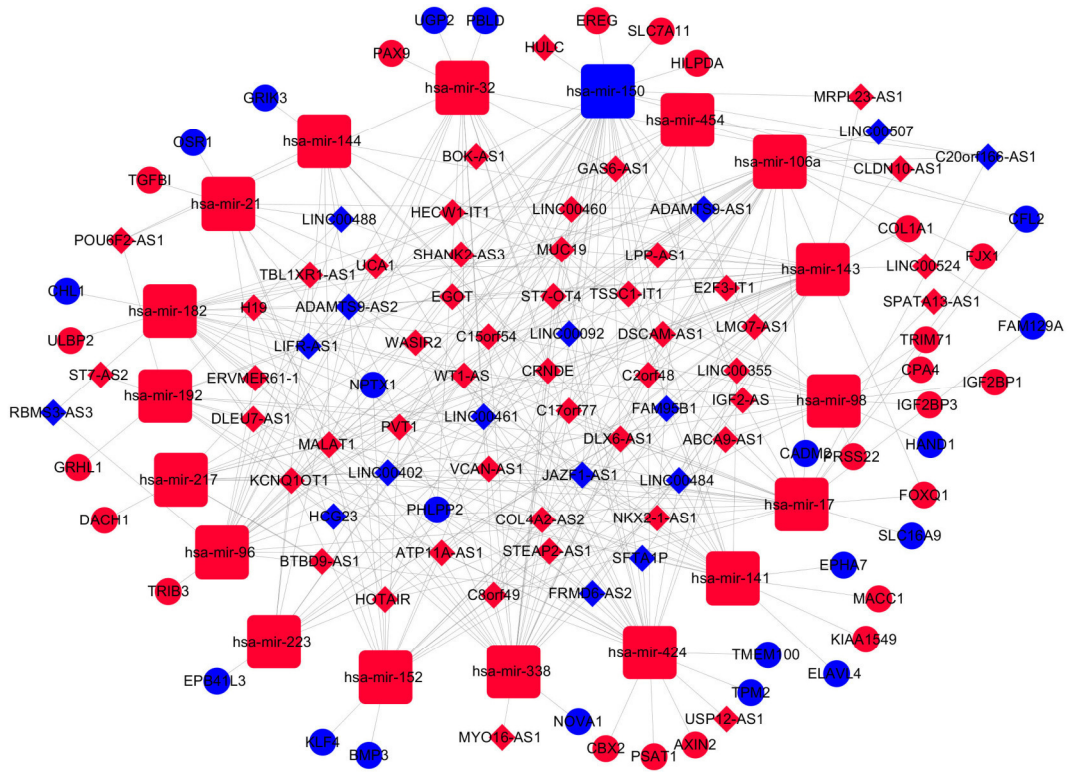

Supplement: Supplementary file 1 [file 13078133]
